# Supplementary figures and images for: Simultaneous detection of dopamine, uric acid, and ascorbic acid using SnO2 nanoparticles/multi-walled carbon nanotubes/carbon paste electrode
Source: Royal Society of Chemistry journal article supplement (doi:10.1039/c2ay25401h), 2012-01-01

Figure 1

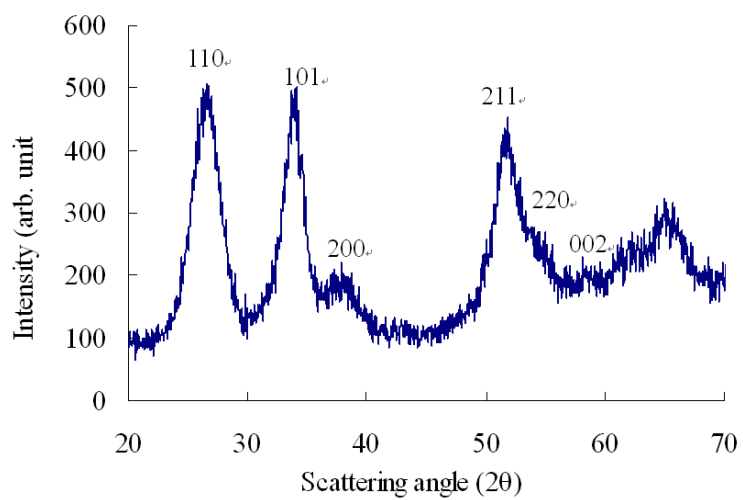

XRD patterns of the SnO<sub>2</sub> nanoparticles

Supplement: c2ay25401h.pdf [file c2ay25401h.pdf]
